# Supplementary material for: Evaluation of Toxicogenomics Approaches for Assessing the Risk of Nongenotoxic Carcinogenicity in Rat Liver
Source: PLoS One. 2014 May 14;9(5):e97678. doi: 10.1371/journal.pone.0097678 (PMC4020844; doi:10.1371/journal.pone.0097678)
Supplement: Table S1 — Excel file with published and predicted signatures. This file contains the Affymetrix probesets, gene symbols, Entrez Gene IDs and descriptions of all genes contained in published or novel signatures in tabular format. If necessary, custom probesets were mapped to the corresponding Affymetrix IDs via the associated gene symbols. (XLS) [file pone.0097678.s010.xls]

## Sheet: Auerbach
Probeset_ID	Gene_Symbol	EntrezGene_ID	Description
1368736_at	Tsx	29391	Testis-specific protein TSX
1369318_at	Fhit	60398	Bis(5'-adenosyl)-triphosphatase
1370269_at	Cyp1a1	24296	Cytochrome P450 1A1Cytochrome P450MT2ACytochrome P450MT2B
1370583_s_at
1373956_at	Fundc1	363442	FUN14 domain-containing protein 1
1377185_at	Tmem229b	503035	transmembrane protein 229B
1377962_at	Mybl2	296344	myb-related protein B
1381702_at	Sox30	689918	Uncharacterized protein
1390317_at	RGD1561849	500393	similar to RIKEN cDNA 3110035E14 (RGD1561849), mRNA
1391883_at	Wwox	292041	WW domain-containing oxidoreductase
1392754_at	Adam8	499285	Uncharacterized protein

## Sheet: Ellinger
Probeset_ID	Gene_Symbol	EntrezGene_ID	Description
1367729_at	Oat	64313	Ornithine aminotransferase, mitochondrial
1367764_at	Ccng1	25405	Cyclin-G1
1367776_at	Cdk1	54237	Cyclin-dependent kinase 1
1367794_at	A2m	24153	Alpha-2-macroglobulin
1367811_at	Phgdh	58835	D-3-phosphoglycerate dehydrogenase
1368121_at	Akr7a3	26760	Aflatoxin B1 aldehyde reductase member 3
1368155_at	Cyp2c12	25011
1368271_a_at	Fabp4	79451	Fatty acid-binding protein, adipocyte
1368308_at	Myc	24577	Myc proto-oncogene protein
1368388_at	Maf	54267	Transcription factor Maf
1368543_at	Nox4	85431	NADPH oxidase 4
1368753_at	Camkk2	83506	Calcium/calmodulin-dependent protein kinase kinase 2
1368778_at	Slc6a6	29464	Sodium- and chloride-dependent taurine transporter
1368905_at	Ces2c	171118	carboxylesterase 2C precursor
1369072_at	Adh7	171178	Alcohol dehydrogenase class 4 mu/sigma chain
1369152_at	Ppp3r1	29748	Calcineurin subunit B type 1
1369407_at	Tnfrsf11b	25341	Tumor necrosis factor receptor superfamily member 11B
1369505_at	Cds2	114101	Phosphatidate cytidylyltransferase 2
1369562_at	Hpcal1	50871	Hippocalcin-like protein 1
1369698_at	Abcc3	140668	Canalicular multispecific organic anion transporter 2
1369809_at	Htr1a	24473	5-hydroxytryptamine receptor 1A
1370123_a_at	Cttn	60465	cortactin isoform B
1370153_at	Gdf15	29455	Growth/differentiation factor 15
1370157_at	Pln	64672	Cardiac phospholamban
1370491_a_at	Hdc	24443	Histidine decarboxylase
1370583_s_at
1370728_at	Il13ra1	252963	interleukin-13 receptor subunit alpha-1
1370828_at	Zdhhc2	246326	Palmitoyltransferase ZDHHC2
1370972_x_at
1370995_at	Pou2f1	171068	POU domain, class 2, transcription factor 1
1371010_at	Nkx2-1	25628	Homeobox protein Nkx-2.1
1371036_at	Nrcam	497815	Neuronal cell adhesion molecule
1371143_at	Serpina7	81806	Thyroxine-binding globulin
1371150_at	Ccnd1	58919	G1/S-specific cyclin-D1
1371209_at	RT1-CE5	309607	RT1 class I, locus CE5 isoform 2
1371210_s_at
1371211_a_at	Nrg1	112400	Pro-neuregulin-1, membrane-bound isoformNeuregulin-1
1372263_at
1372518_at
1372868_at	Tor3a	304884	Torsin-3A
1373066_at
1373797_at	Hyal3	300993	Hyaluronidase-3
1373975_at	Inmt	368066	indolethylamine N-methyltransferase
1374245_at	Nhej1	363251	Non-homologous end-joining factor 1
1374531_at
1374796_at	Sgcb	680229	beta-sarcoglycan
1375224_at	Phlda3	363989	Pleckstrin homology-like domain family A member 3
1375243_at
1375335_at	Hsp90ab1	301252	Heat shock protein HSP 90-beta
1375444_at	Ap3d1	314633	AP-3 complex subunit delta-1
1375595_at	Arih1	300756	ariadne ubiquitin-conjugating enzyme E2 binding protein homolog 1
1375708_at	Col27a1	298101	Collagen alpha-1(XXVII) chain
1375774_at
1375775_at	Odf3b	500917	outer dense fiber protein 3B
1375889_at	Sms	363469	spermine synthase
1375897_at
1376100_at	Tubb6	307351	tubulin, beta 6
1376185_at	Kifc1	294286	Kinesin-like protein KIFC1
1376590_at
1376892_at	Gria3	29628	Glutamate receptor 3
1377037_at	Acot4	681337	acyl-CoA thioesterase 3
1377183_at
1378691_at
1378932_at	Srprb	300965	Signal recognition particle receptor subunit beta
1383485_at	Mdm2	314856	E3 ubiquitin-protein ligase Mdm2
1383684_at	Asf1b	304648	ASF1 anti-silencing function 1 homolog B
1384427_at	Mdm2	314856	E3 ubiquitin-protein ligase Mdm2
1384474_at
1385704_at
1386220_at
1386994_at	Btg2	29619	Protein BTG2
1387022_at	Aldh1a1	24188	Retinal dehydrogenase 1
1387263_at	Pklr	24651	Pyruvate kinase isozymes R/L
1387288_at	Neurod1	29458	Neurogenic differentiation factor 1
1387391_at	Cdkn1a	114851	cyclin-dependent kinase inhibitor 1
1387405_at	Ralgapa1	56785
1387716_at	Utrn	25600	utrophin
1387851_at	Pter	63852	Phosphotriesterase-related protein
1388066_a_at	Grk6	59076	G protein-coupled receptor kinase 6
1388211_s_at
1388255_x_at	RT1-CE5	309607	RT1 class I, locus CE5 isoform 2
1388674_at	Cdkn1a	114851	cyclin-dependent kinase inhibitor 1
1388689_at	Acyp2	364224
1388876_at
1388932_at	Lama5	140433	laminin subunit alpha-5
1389221_at	Mmd2	304301	monocyte to macrophage differentiation-associated 2
1390071_at	Arhgap23	303501	Uncharacterized protein
1390137_at	Traf4af1	311325	Putative TRAF4-associated factor 1
1390317_at	RGD1561849	500393	similar to RIKEN cDNA 3110035E14 (RGD1561849), mRNA
1390375_at	Akap8l	299569	A-kinase anchor protein 8-like
1390481_a_at	Ube2t	360847	ubiquitin-conjugating enzyme E2 T
1390676_at
1392467_at	Impa2	282636	Inositol monophosphatase 2
1392720_at	Cyp4f17	500801	cytochrome P450, family 4, subfamily f, polypeptide 17
1393759_at
1393873_s_at	Osbpl2	296461	oxysterol-binding protein-related protein 2
1398250_at	Acot1	50559	Acyl-coenzyme A thioesterase 1
1398411_at
1398413_at	Zfp444	292569	zinc finger protein 444
1398449_at
1398469_at	Ppp3cc	171378	serine/threonine-protein phosphatase 2B catalytic subunit gamma isoform

## Sheet: Fielden
Probeset_ID	Gene_Symbol	EntrezGene_ID	Description
1367711_at	Psmc2	25581	26S protease regulatory subunit 7
1367787_at	Ica1	81024	Islet cell autoantigen 1
1367985_at	Alas2	25748
1368148_at	Ngfr	24596	Tumor necrosis factor receptor superfamily member 16
1368358_a_at	Ptprr	94202	Receptor-type tyrosine-protein phosphatase R
1368489_at	Fosl1	25445	Fos-related antigen 1
1368504_at	Lamp1	25328	Lysosome-associated membrane glycoprotein 1
1368511_at	Bhlhe41	117095
1368736_at	Tsx	29391	Testis-specific protein TSX
1369068_at	Cul5	64624	Cullin-5
1370225_at	Cited4	114491
1370445_at	Pla1a	85311	Phospholipase A1 member A
1370619_at	Ccl22	117551	C-C motif chemokine 22
1370620_at	Ccl22	117551	C-C motif chemokine 22
1370693_a_at	Cnp	25275	2',3'-cyclic-nucleotide 3'-phosphodiesterase
1370928_at	Litaf	65161	Lipopolysaccharide-induced tumor necrosis factor-alpha factor homolog
1371023_at	Megf8	114029	Multiple epidermal growth factor-like domains protein 8
1372920_at	Prodh	680409	proline dehydrogenase, mitochondrial
1373158_at	Gpr146	498153	probable G-protein coupled receptor 146
1374176_at	RGD1308059	362535	Uncharacterized protein C9orf150 homolog
1377499_a_at	Hrc	292905	sarcoplasmic reticulum histidine-rich calcium-binding protein
1377993_at	Gng13	685451	guanine nucleotide binding protein (G protein), gamma 13
1379354_at	Extl2	310803	exostosin-like 2
1379369_at	Prickle1	315259	Prickle-like protein 1
1382266_at	Gpr146	498153	probable G-protein coupled receptor 146
1387421_at	Kcnip3	65199	Calsenilin
1387897_at	Cnp	25275	2',3'-cyclic-nucleotide 3'-phosphodiesterase
1389659_at	Ctla2a	498690	protein CTLA-2-alpha
1390008_at	Cited4	114491
1390415_at	Trip13	292206	Thyroid receptor-interacting protein 13
1390865_at	Cadps2	312166	Uncharacterized protein
1391371_at	Prodh	680409	proline dehydrogenase, mitochondrial
1393306_at	Cul5	64624	Cullin-5
1395805_at	Prickle1	315259	Prickle-like protein 1
1398816_at	Lamp1	25328	Lysosome-associated membrane glycoprotein 1

## Sheet: Nakayama
Probeset_ID	Gene_Symbol	EntrezGene_ID	Description
1367764_at	Ccng1	25405	Cyclin-G1
1367847_at	P8	113900	Nuclear protein 1
1368121_at	Akr7a3	26760	Aflatoxin B1 aldehyde reductase member 3
1368155_at	Cyp2c12	25011
1368177_at	Acsl3	114024	Long-chain-fatty-acid--CoA ligase 3
1368311_at	Mgmt	25332	Methylated-DNA--protein-cysteine methyltransferase
1368399_a_at	Pgcp	58952	Plasma glutamate carboxypeptidase
1368520_at	Apoa4	25080	Apolipoprotein A-IV
1368691_at	Gria3	29628	Glutamate receptor 3
1368718_at	Aldh1a7	29651
1369122_at	Bax	24887	Apoptosis regulator BAX
1369318_at	Fhit	60398	Bis(5'-adenosyl)-triphosphatase
1369570_at
1369727_at	Apoa2	25649	Apolipoprotein A-II
1369900_at	Fas	246097	Tumor necrosis factor receptor superfamily member 6
1370009_at	Apoc3	24207
1370026_at	Cryab	25420	Alpha-crystallin B chain
1370147_at	Acmsd	171385	2-amino-3-carboxymuconate-6-semialdehyde decarboxylase
1370548_at	Slc16a10	170566	Monocarboxylate transporter 10
1370583_s_at
1371143_at	Serpina7	81806	Thyroxine-binding globulin
1371377_at	Rps19	29287	40S ribosomal protein S19
1373975_at	Inmt	368066	indolethylamine N-methyltransferase
1374198_at	Cd276	315716	CD276 antigen
1375224_at	Phlda3	363989	Pleckstrin homology-like domain family A member 3
1375900_at	Tnfrsf9	500590	tumor necrosis factor receptor superfamily member 9
1376892_at	Gria3	29628	Glutamate receptor 3
1378550_at	Cblc	292699	Cas-Br-M (murine) ecotropic retroviral transforming sequence c
1383076_at	Swt1	289088	similar to RIKEN cDNA 1200016B10 (RGD1308695), mRNA
1383491_at	Aen	361594	Apoptosis-enhancing nuclease
1384645_at	Toag1	363169	tolerance-associated gene 1
1384842_s_at	Fas	246097	Tumor necrosis factor receptor superfamily member 6
1384997_at	Aen	361594	Apoptosis-enhancing nuclease
1385574_at	RGD1308114	361253
1386985_at	Gstm1	24423	Glutathione S-transferase Mu 1
1386994_at	Btg2	29619	Protein BTG2
1386995_at	Btg2	29619	Protein BTG2
1387021_at	Zmat3	64394	Zinc finger matrin-type protein 3
1387022_at	Aldh1a1	24188	Retinal dehydrogenase 1
1387111_at	Ddah1	64157	N(G),N(G)-dimethylarginine dimethylaminohydrolase 1
1387191_at	Pbsn	54193	Probasin
1387391_at	Cdkn1a	114851	cyclin-dependent kinase inhibitor 1
1387669_a_at	Ephx1	25315	Epoxide hydrolase 1
1387967_at	Spink1	266602	Serine protease inhibitor Kazal-type 3
1387994_at	Hsd17b6	286964	17-beta-hydroxysteroid dehydrogenase type 6
1388055_at	Cyp4f5	286905	Cytochrome P450 4F5
1388199_at	Epcam	171577	Epithelial cell adhesion molecule
1388325_at	Atp6v1d	299159	V-type proton ATPase subunit D
1388557_at	Tubb4b	296554	Tubulin beta-2C chain
1388674_at	Cdkn1a	114851	cyclin-dependent kinase inhibitor 1
1388753_at	Sulf2	311642	extracellular sulfatase Sulf-2
1389386_at	Toag1	363169	tolerance-associated gene 1
1390868_at	Swt1	289088	similar to RIKEN cDNA 1200016B10 (RGD1308695), mRNA
1395293_at	Sulf2	311642	extracellular sulfatase Sulf-2
1395737_at	Cd276	315716	CD276 antigen
1397221_s_at	Fas	246097	Tumor necrosis factor receptor superfamily member 6

## Sheet: Nie
Probeset_ID	Gene_Symbol	EntrezGene_ID	Description
1371237_a_at	Mt1a	24567	Metallothionein-1
1376073_at	Sel1l	314352	Protein sel-1 homolog 1
1371246_at	Nutf2	291981	Nuclear transport factor 2
1376112_a_at	Nutf2	291981	Nuclear transport factor 2
1367619_at	Pgrmc1	291948	Membrane-associated progesterone receptor component 1
1371031_at	Mat1a	25331
1370698_at	Ugt2b1	286954	UDP-glucuronosyltransferase 2B1

## Sheet: Uehara (2008)
Probeset_ID	Gene_Symbol	EntrezGene_ID	Description
1367590_at	Ran	84509	GTP-binding nuclear protein Ran
1367617_at	Aldoa	24189	Fructose-bisphosphate aldolase A
1367654_at	Fat1	83720	protocadherin Fat 1
1367693_at	Ywhah	25576	14-3-3 protein eta
1367713_at	Eif2s1	54318	Eukaryotic translation initiation factor 2 subunit 1
1367732_at	Gnb1	24400	Guanine nucleotide-binding protein G(I)/G(S)/G(T) subunit beta-1
1367764_at	Ccng1	25405	Cyclin-G1
1367795_at	Ifrd1	29596
1367834_at	Srm	84596	spermidine synthase
1367870_at	Glrx3	58815	Glutaredoxin-3
1368032_at	Nolc1	64896	Nucleolar and coiled-body phosphoprotein 1
1368072_at	Btg3	54230	Protein BTG3
1368106_at	Plk2	83722	Serine/threonine-protein kinase PLK2
1368121_at	Akr7a3	26760	Aflatoxin B1 aldehyde reductase member 3
1368173_at	Nop58	60373	Nucleolar protein 58
1369921_at	Gstm3	57298	glutathione S-transferase Mu 3
1370174_at	Ppp1r15a	171071	Protein phosphatase 1 regulatory subunit 15A
1370184_at	Cfl1	29271	Cofilin-1
1370295_at	Nme1	191575	Nucleoside diphosphate kinase A
1370309_a_at	Hnrnpab	83498	heterogeneous nuclear ribonucleoprotein A/B
1370314_at	Slc20a1	81826	Sodium-dependent phosphate transporter 1
1370583_s_at
1370785_s_at	Tomm20	266601	Mitochondrial import receptor subunit TOM20 homolog
1370947_at	Setd4	245975	SET domain-containing protein 4
1371377_at	Rps19	29287	40S ribosomal protein S19
1371378_at	Eif1	287703	eukaryotic translation initiation factor 1
1371498_at	Aimp2	288480	Aminoacyl tRNA synthase complex-interacting multifunctional protein 2
1371530_at	Krt8	25626	Keratin, type II cytoskeletal 8
1371539_at	Nhp2	287273	NHP2 ribonucleoprotein homolog
1371735_at
1371785_at	Tnfrsf12a	302965	tumor necrosis factor receptor superfamily member 12A
1371809_at	Mrps18b	294230	mitochondrial ribosomal protein S18B
1371936_at	Eif4a1	287436	eukaryotic initiation factor 4A-I
1371980_at	Atad3a	298682	ATPase family AAA domain-containing protein 3
1372019_at	Med10	290939	mediator complex subunit 10
1372028_at	Nop16	306768	Nucleolar protein 16
1372043_at	Mrto4	298586	mRNA turnover protein 4 homolog
1372116_at	Mrps2	362094	28S ribosomal protein S2, mitochondrial
1372150_at	Usp10	307905	Ubiquitin carboxyl-terminal hydrolase 10
1372211_at	Mafk	246760	transcription factor MafK
1372218_at	Wdr12	363237	Ribosome biogenesis protein WDR12
1372243_at	Cab39	301574	calcium-binding protein 39
1372255_at	Rars	287191	Arginyl-tRNA synthetase, cytoplasmic
1372354_at	Dusp16	297682	dual specificity protein phosphatase 16
1372461_at	Set	307947	Fuctinin-1
1372510_at	Srxn1	296271
1372558_at	Naa15	310399	N-alpha-acetyltransferase 15, NatA auxiliary subunit
1373075_at	RGD1560888	498140
1373200_at	Eef1e1	291057	eukaryotic translation elongation factor 1 epsilon-1
1373380_at	Zc3h15	362154	Zinc finger CCCH domain-containing protein 15
1373499_at	Gas5	81714
1373647_at
1373677_at
1373767_at	Zfand2a	360772	AN1-type zinc finger protein 2A
1373850_at	Smpdl3b	362619	acid sphingomyelinase-like phosphodiesterase 3b
1374326_at	Ppan	298699	suppressor of SWI4 1 homolog
1374632_at	Jmjd6	360665
1374764_at	Nop14	289724	nucleolar protein 14
1374793_at	Wdr3	310720	WD repeat-containing protein 3
1374945_at	Trmt61a	314462	tRNA (adenine-N(1)-)-methyltransferase catalytic subunit TRMT61A
1375224_at	Phlda3	363989	Pleckstrin homology-like domain family A member 3
1375895_at	Tsr1	100360406	RCG34104, isoform CRA_aUncharacterized protein
1376001_at	Polr1e	313245	DNA-directed RNA polymerase I subunit RPA49
1376098_a_at
1376737_at	LOC100912041	100912041
1377387_a_at
1384427_at	Mdm2	314856	E3 ubiquitin-protein ligase Mdm2
1385616_a_at	Asf1a	294408	ASF1 anti-silencing function 1 homolog A
1386897_at	Prmt1	60421	Protein arginine N-methyltransferase 1
1386910_a_at	Apex1	79116	DNA-(apurinic or apyrimidinic site) lyaseDNA-(apurinic or apyrimidinic site) lyase, mitochondrial
1386958_at	Txnrd1	58819
1386995_at	Btg2	29619	Protein BTG2
1387048_at	Ddx39a	89827	ATP-dependent RNA helicase DDX39A
1387060_at	Klf6	58954	Krueppel-like factor 6
1387072_at	Wnk1	116477	Serine/threonine-protein kinase WNK1
1387282_at	Hspb8	113906	Heat shock protein beta-8
1387774_at	Ywhaz	25578	14-3-3 protein zeta/delta
1387807_at	Pafah1b1	83572	Platelet-activating factor acetylhydrolase IB subunit alpha
1387911_at	Rabggtb	25533	Geranylgeranyl transferase type-2 subunit beta
1387950_at	Nip7	192180	60S ribosome subunit biogenesis protein NIP7 homolog
1387973_at	Cyp4f4	286904	Cytochrome P450 4F4
1388107_at	Ppp2r2d	246255	Serine/threonine-protein phosphatase 2A 55 kDa regulatory subunit B delta isoform
1388150_at	Xpo1	85252	Exportin-1
1388155_at	Krt18	294853
1388244_s_at	Rpsa	29236	40S ribosomal protein SA
1388381_at	Eif3g	298700	Eukaryotic translation initiation factor 3 subunit G
1388397_at	Ebna1bp2	114021	probable rRNA-processing protein EBP2
1388449_at	Eef1b2	363241	elongation factor 1-beta
1388507_at	Eif6	305506
1388560_at	Wdr77	310769	Methylosome protein 50
1388588_at	Fam89b	309170	mammary tumor virus receptor 2
1388629_at	Impdh2	301005	inosine-5'-monophosphate dehydrogenase 2
1388666_at	Enc1	294674	ectoderm-neural cortex protein 1
1388674_at	Cdkn1a	114851	cyclin-dependent kinase inhibitor 1
1388754_at	LOC100911177	100911177
1388900_at
1388986_at
1388990_at	Mki67ip	246042	MKI67 FHA domain-interacting nucleolar phosphoprotein
1389200_at	Bysl	359727
1389450_at	Wbscr22	368084	Williams Beuren syndrome chromosome region 22
1389569_at	Brix1	294799	Ribosome biogenesis protein BRX1 homolog
1389577_at	Cirh1a	291987	cirhin
1389815_at	Ppp1r14b	259225	Protein phosphatase 1 regulatory subunit 14B
1390317_at	RGD1561849	500393	similar to RIKEN cDNA 3110035E14 (RGD1561849), mRNA
1390579_at	RGD1305222	290686	similar to RIKEN cDNA 1810029B16 (RGD1305222), mRNA
1398756_at	Npm1	25498	Nucleophosmin
1398757_at	Npm1	25498	Nucleophosmin
1398771_at	Slc3a2	50567	4F2 cell-surface antigen heavy chain
1398791_at	Txnrd1	58819
1398801_at	Nsa2	171456	Ribosome biogenesis protein NSA2 homolog
1398832_at	Ncl	25135	Nucleolin
1399158_a_at	Npm1	25498	Nucleophosmin

## Sheet: Uehara (2011)
Probeset_ID	Gene_Symbol	EntrezGene_ID	Description
1370583_s_at
1395737_at	Cd276	315716	CD276 antigen
1367787_at	Ica1	81024	Islet cell autoantigen 1
1374198_at	Cd276	315716	CD276 antigen
1379419_at	Tmem184c	291946	Transmembrane protein 184C
1379262_at	Acot9	302640	acyl-coenzyme A thioesterase 9, mitochondrial
1383401_at	Tes	500040	Testin
1375719_s_at	Cdh13	192248	cadherin-13
1373102_at	Cdh13	192248	cadherin-13
1391032_at	Sez6	192247	seizure related 6 homolog
1387505_at	Gnai1	25686	Guanine nucleotide-binding protein G(k) subunit alpha
1372104_at
1388583_at	Cxcl12	24772	chemokine (C-X-C motif) ligand 12 isoform beta
1396155_at
1368530_at	Mmp12	117033	Macrophage metalloelastase
1386890_at	S100a10	81778	Protein S100-A10
1383906_at	Neurl3	316326	E3 ubiquitin-protein ligase NEURL3
1390419_a_at	Tusc3	290783	tumor suppressor candidate 3
1384449_at
1373852_at	Srd5a3	305291	Probable polyprenol reductase
1388450_at	Synrg	84479	Synergin gamma
1374898_at	RGD1311422	287822	Uncharacterized protein
1389857_at	Wbp5	680354	WW domain-binding protein 5
1387215_at	Agxt	24792	Serine--pyruvate aminotransferase, mitochondrial
1380021_at	Dennd2d	310772	DENN domain-containing protein 2D
1390839_at	Pqlc3	298906	PQ-loop repeat-containing protein 3
1387372_at	Slc6a13	171163	Sodium- and chloride-dependent GABA transporter 2
1367584_at	Anxa2	56611	Annexin A2
1370420_at	Srd5a1	24950	3-oxo-5-alpha-steroid 4-dehydrogenase 1
1371989_at	Hmgn3	113990	High mobility group nucleosome-binding domain-containing protein 3
1389374_at	Kifc3	307644	kinesin-like protein KIFC3
1387325_at	Slc27a5	79111	Bile acyl-CoA synthetase
1373960_at	Tmem120a	288591	Transmembrane protein 120A
1367655_at	Tmsb10	50665	Thymosin beta-10
1372004_at	Hebp1	362454	heme-binding protein 1
1371572_at	App	54226	Amyloid beta A4 proteinN-APPSoluble APP-alphaSoluble APP-betaC99Beta-amyloid protein 42Beta-amyloid protein 40C83P3(42)P3(40)C80Gamma-secretase C-terminal fragment 59Gamma-secretase C-terminal fragment 57Gamma-secretase C-terminal fragment 50C31
1384510_at
1387959_at	Aspg	246266	60 kDa lysophospholipaseL-asparaginasePlatelet-activating factor acetylhydrolase
1389274_at	Dcakd	360639	Dephospho-CoA kinase domain-containing protein
1384512_at	LOC100363441	100363441
1369558_at	Inhbc	64549	Inhibin beta C chain
1367764_at	Ccng1	25405	Cyclin-G1
1387243_at	Cyp1a2	24297
1372773_at	Npdc1	296562	neural proliferation differentiation and control protein 1
1371571_at	App	54226	Amyloid beta A4 proteinN-APPSoluble APP-alphaSoluble APP-betaC99Beta-amyloid protein 42Beta-amyloid protein 40C83P3(42)P3(40)C80Gamma-secretase C-terminal fragment 59Gamma-secretase C-terminal fragment 57Gamma-secretase C-terminal fragment 50C31
1367654_at	Fat1	83720	protocadherin Fat 1
1371875_at	Manba	310864	Beta-mannosidase
1374133_at	Trit1	362586	tRNA dimethylallyltransferase, mitochondrial
1368278_at	Lgals2	171134	Galectin-2
1388325_at	Atp6v1d	299159	V-type proton ATPase subunit D
1371840_at	S1pr1	29733	Sphingosine 1-phosphate receptor 1
1370026_at	Cryab	25420	Alpha-crystallin B chain
1371530_at	Krt8	25626	Keratin, type II cytoskeletal 8
1397744_at
1377375_at	Aass	296925
1386718_at	Akr1c19	307096	aldo-keto reductase family 1, member C19
1387877_at	Ftcd	89833	Formimidoyltransferase-cyclodeaminaseGlutamate formimidoyltransferaseFormimidoyltetrahydrofolate cyclodeaminase
1370282_at	Csrp2	29317	Cysteine and glycine-rich protein 2
1368452_at	Abcc6	81642	Multidrug resistance-associated protein 6
1368296_at	Slco2b1	140860	Solute carrier organic anion transporter family member 2B1
1388521_at	Aldh18a1	361755	delta-1-pyrroline-5-carboxylate synthase
1382221_at
1376073_at	Sel1l	314352	Protein sel-1 homolog 1
1382244_at
1369664_at	Avpr1a	25107	Vasopressin V1a receptor
1378819_at	Aspdh	292875	Putative L-aspartate dehydrogenase
1368295_at	Slco2b1	140860	Solute carrier organic anion transporter family member 2B1
1369960_at	Fxyd1	58971	Phospholemman
1382599_at
1371659_at	Rhoc	295342	Transforming protein RhoA
1370875_at	Ezr	54319	Ezrin
1387994_at	Hsd17b6	286964	17-beta-hydroxysteroid dehydrogenase type 6
1368814_at	Aldh6a1	81708	Methylmalonate-semialdehyde dehydrogenase
1373947_at	Dpt	289178	dermatopontin
1387765_at	Mbl1	24548	Mannose-binding protein A
1388469_at
1370836_at	Serpina4	246328	kallistatin
1383904_at	Fgl1	246186	Fibrinogen-like protein 1
1393826_at	Apon	304603	apolipoprotein N
1387672_at	Gnmt	25134	Glycine N-methyltransferase
1372250_at	Dbndd2	499941	dysbindin domain-containing protein 2
1383605_at	LOC360919	360919	alpha-fetoprotein related protein

## Sheet: EFS with standard methods
Probeset_ID	Gene_Symbol	EntrezGene_ID	Description
1368143_at	Anxa7	155423	annexin A7
1370828_at	Zdhhc2	246326	Palmitoyltransferase ZDHHC2
1373970_at	Il33	361749	Interleukin-33
1375422_at
1377064_at	Dusp6	116663	Dual specificity protein phosphatase 6
1387024_at	Dusp6	116663	Dual specificity protein phosphatase 6
1367632_at	Glul	24957
1368905_at	Ces2c	171118	carboxylesterase 2C precursor
1369161_at	Abcb4	24891	Multidrug resistance protein 2
1369440_at	Abcg8	155192
1369455_at	Abcg5	114628	ATP-binding cassette sub-family G member 5
1370803_at	Zwint	257644
1371724_at	Rexo2	300689	Oligoribonuclease, mitochondrial
1372029_at	Plin3	316130	Uncharacterized protein
1376652_at	C1qa	298566	Complement C1q subcomponent subunit A
1379262_at	Acot9	302640	acyl-coenzyme A thioesterase 9, mitochondrial
1383585_s_at
1389581_at	Il33	361749	Interleukin-33
1393443_a_at	Emc9	290224	UPF0172 protein FAM158A
1397259_at	Fam126b	316415	family with sequence similarity 126, member B (Fam126b), mRNA
1367733_at	Ca2	54231	Carbonic anhydrase 2
1367795_at	Ifrd1	29596
1367817_at	Hdgf	114499	Hepatoma-derived growth factor
1367855_at	Scarb1	25073	Scavenger receptor class B member 1
1367856_at	G6pd	24377	Glucose-6-phosphate 1-dehydrogenase
1367948_a_at	Kdr	25589
1367994_at	Dpyd	81656
1368121_at	Akr7a3	26760	Aflatoxin B1 aldehyde reductase member 3
1368171_at	Lox	24914	Protein-lysine 6-oxidase
1368172_a_at	Lox	24914	Protein-lysine 6-oxidase
1368317_at	Aqp7	29171	Aquaporin-7
1368718_at	Aldh1a7	29651
1369552_at	Samsn1	170637	SAM domain-containing protein SAMSN-1
1369693_a_at	Slc1a2	29482	Excitatory amino acid transporter 2
1369921_at	Gstm3	57298	glutathione S-transferase Mu 3
1370067_at	Me1	24552	NADP-dependent malic enzyme
1370088_at	Spa17	85244	sperm surface protein Sp17
1370215_at	C1qb	29687	Complement C1q subcomponent subunit B
1370218_at	Ldhb	24534	L-lactate dehydrogenase B chain
1370252_at
1370429_at	RT1-EC2	24737
1370870_at	Me1	24552	NADP-dependent malic enzyme
1371065_at
1371571_at	App	54226	Amyloid beta A4 proteinN-APPSoluble APP-alphaSoluble APP-betaC99Beta-amyloid protein 42Beta-amyloid protein 40C83P3(42)P3(40)C80Gamma-secretase C-terminal fragment 59Gamma-secretase C-terminal fragment 57Gamma-secretase C-terminal fragment 50C31
1371572_at	App	54226	Amyloid beta A4 proteinN-APPSoluble APP-alphaSoluble APP-betaC99Beta-amyloid protein 42Beta-amyloid protein 40C83P3(42)P3(40)C80Gamma-secretase C-terminal fragment 59Gamma-secretase C-terminal fragment 57Gamma-secretase C-terminal fragment 50C31
1371617_at	Psmd13	365388	26S proteasome non-ATPase regulatory subunit 13
1371623_at	LOC685888	685888
1371817_at	Isyna1	290651	Inositol-3-phosphate synthase 1
1372134_at	Chchd6	297436	coiled-coil-helix-coiled-coil-helix domain-containing protein 6
1372423_at	Perp	292949	p53 apoptosis effector related to PMP-22
1372557_at	Arl6	363760	ADP-ribosylation factor-like protein 6
1372686_at	Psmg4	689623	proteasome (prosome, macropain) assembly chaperone 4
1372841_at	Reep6	362835	Receptor expression-enhancing protein 6
1372927_at	Mrpl50	362517	39S ribosomal protein L50, mitochondrial

## Sheet: EFS with statistical methods
Probeset_ID	Gene_Symbol	EntrezGene_ID	Description
1398933_at	Higd2a	290999	HIG1 hypoxia inducible domain family, member 2A
1392227_at	Fam206a	298018	Protein LOC298018; RCG31985
1394820_at	Clpb	65041	caseinolytic peptidase B protein homolog
1398213_at
1398754_at	Uba52	64156	Ubiquitin-60S ribosomal protein L40 Ubiquitin 60S ribosomal protein L40
1371494_at
1374941_at
1379521_at	Alg3	287983	dolichyl-P-Man:Man(5)GlcNAc(2)-PP-dolichyl mannosyltransferase
1380094_a_at	Zfp212	297066
1382059_at	Fbxo30	308283	F-box only protein 30
1382303_at	Phactr1	306844	phosphatase and actin regulator 1
1386274_at	Slc17a2	306950	sodium-dependent phosphate transport protein 3
1386864_at	Pgam1	24642	Phosphoglycerate mutase 1
1388508_at	Fam32a	498600	Protein FAM32A
1388580_at	Pygo2	295251	pygopus homolog 2
1389050_at	Dusp3	498003	dual specificity phosphatase 3
1389177_at	Perp	292949	p53 apoptosis effector related to PMP-22
1389581_at	Il33	361749	Interleukin-33
1389625_at
1390348_at	Folr2	293154	folate receptor beta precursor
1390655_at	LOC100363005	100363005
1390793_at	Ttc33	294774	tetratricopeptide repeat protein 33
1390922_at
1390938_at	Arhgap28	301709	rho GTPase-activating protein 28
1391470_at	Ipo5	306182	Protein Ipo5
1391750_at
1392347_at
1392363_at	Tmem164	367763	transmembrane protein 164
1392635_at
1393137_at	Tctex1d1	362553	Tctex1 domain containing 1
1393185_at
1393206_at
1393443_a_at	Emc9	290224	ER membrane protein complex subunit 9
1393513_at
1393621_at
1393902_at	Akr1c1	307092	aldo-keto reductase family 1, member C1

## Sheet: EFS with all methods
Probeset_ID	Gene_Symbol	EntrezGene_ID	Description
1370828_at	Zdhhc2	246326	Palmitoyltransferase ZDHHC2
1375422_at
1377064_at	Dusp6	116663	Dual specificity protein phosphatase 6
1387024_at	Dusp6	116663	Dual specificity protein phosphatase 6
1389177_at	Perp	292949	p53 apoptosis effector related to PMP-22
1392227_at	Fam206a	298018	Protein LOC298018; RCG31985
1368143_at	Anxa7	155423	annexin A7
1373970_at	Il33	361749	Interleukin-33
1376652_at	C1qa	298566	Complement C1q subcomponent subunit A
1381759_at	RGD1565975	291903
1382051_at	Hscb	360826	iron-sulfur cluster co-chaperone protein HscB, mitochondrial precursor
1389581_at	Il33	361749	Interleukin-33
1391619_at	Bhlhb9	317407	Protein BHLHb9
1392539_at
1393443_a_at	Emc9	290224	ER membrane protein complex subunit 9
1397259_at	Fam126b	316415	uncharacterized protein LOC316415
1398933_at	Higd2a	290999	HIG1 hypoxia inducible domain family, member 2A
1367632_at	Glul	24957	Glutamine synthetase
1367948_a_at	Kdr	25589	vascular endothelial growth factor receptor 2 precursor
1368755_at	Clec4f	114598	C-type lectin domain family 4 member F
1369031_at	Il18bp	84388	interleukin-18-binding protein precursor
1370088_at	Spa17	85244	sperm surface protein Sp17
1370215_at	C1qb	29687	complement C1q subcomponent subunit B precursor
1370252_at	Avpi1	171386	arginine vasopressin-induced protein 1
1370803_at	Zwint	257644	ZW10 interactor
1372029_at
1372423_at	Perp	292949	p53 apoptosis effector related to PMP-22
1372557_at	Arl6	363760	ADP-ribosylation factor-like protein 6
1372686_at	Psmg4	689623	proteasome (prosome, macropain) assembly chaperone 4
1372841_at	Reep6	362835	Receptor expression-enhancing protein 6
1372948_at	Mrp63	691814	ribosomal protein 63, mitochondrial
1373015_at
1373025_at	C1qc	362634	Complement C1q subcomponent subunit C
1373216_at	LOC691849	691849	uncharacterized protein LOC691849
1373787_at	Slc6a9	116509	Sodium- and chloride-dependent glycine transporter 1
1373810_at	Pla2g12a	362039	group XIIA secretory phospholipase A2 precursor
1373881_at	Arhgdib	362456	rho GDP-dissociation inhibitor 2
1374159_at
1374558_at
1374700_at
1376189_at	Zmym1	313604	zinc finger MYM-type protein 1
1376196_a_at	Med4	306030	Mediator of RNA polymerase II transcription subunit 4
1376390_at	Ms4a11	361735
1376571_at	Tmem42	363171	transmembrane protein 42
1376861_at
1377899_at	RGD1304982	289138	Quinone oxidoreductase-like protein 2
1378326_at	Trub2	366012	Probable tRNA pseudouridine synthase 2
1378428_at
1378933_at	Isy1	362394	Pre-mRNA-splicing factor ISY1 homolog
1379229_at
1379262_at	Acot9	302640	acyl-coenzyme A thioesterase 9, mitochondrial
1379419_at	Tmem184c	291946	Transmembrane protein 184C
1379939_a_at	RGD1306063	289928	uncharacterized protein LOC289928
1380347_at

[truncated: 1 more sheets: SR method]
